# Supplementary material for: CG200745, an HDAC inhibitor, induces anti-tumour effects in cholangiocarcinoma cell lines via miRNAs targeting the Hippo pathway
Source: PubMed Central journal article supplement (PMC5589721; doi:10.1038/s41598-017-11094-3), 2017-09-07
Supplement: 41598_2017_11094_MOESM1_ESM.pdf [file 41598_2017_11094_MOESM1_ESM.pdf]

**CG200745, an HDAC inhibitor, induces anti-tumour effects in cholangiocarcinoma cell lines via miRNAs targeting the Hippo pathway**

Dawoon E. Jung<sup>1\*</sup>, Soo Been Park<sup>2\*</sup>, Kahee Kim<sup>3</sup>, Chanyang Kim<sup>3</sup>, and Si Young Song<sup>1,2,3†</sup>

\*Equal contribution.

<sup>1</sup>Institute of Gastroenterology, Yonsei University College of Medicine, Seoul, Korea

<sup>2</sup>Division of Gastroenterology, Department of Internal Medicine, Yonsei University College of Medicine, Seoul, Korea

<sup>3</sup>Brain Korea 21 PLUS Project for Medical Science, Yonsei University College of Medicine, Seoul, Korea

†**Corresponding author:** Si Young Song, MD, PhD. Division of Gastroenterology, Department of Internal Medicine, Yonsei University College of Medicine, 50-1 Yonsei-ro, Seodaemun-gu, Seoul 120-752, Korea. Phone: +82-2-2228-1957, fax: +82-2-2227-7900, e-mail: [sysong@yuhs.ac](mailto:sysong@yuhs.ac)

**Supplementary Figure 1.** SNU-1196 cells were treated with increasing doses of gemcitabine to establish a GR cell line (SNU-1196/GR). (a, b) Cell viability was assessed with the MTT assay; gemcitabine IC<sub>50</sub> values were 0.038 and 2.291 μM, respectively. (c) Elevated protein levels of c-MET, phospho-AKT, N-cadherin, and ALDH were analysed by western blotting. (d) ALDH enzymatic activity was measured with the ALDEFLUOR kit; cells treated with the specific ALDH inhibitor diethyliminobenzaldehyde served as a negative control. ALDH activity was also measured by flow cytometry.

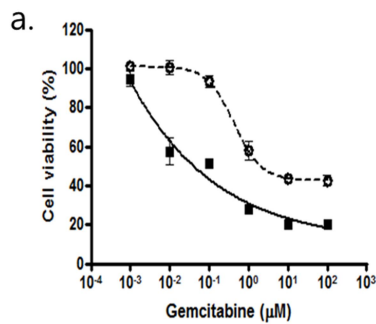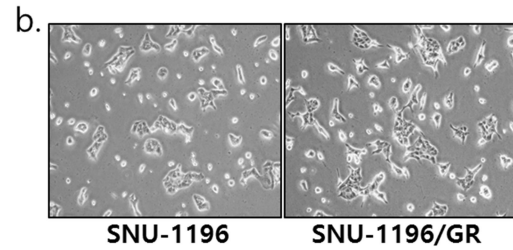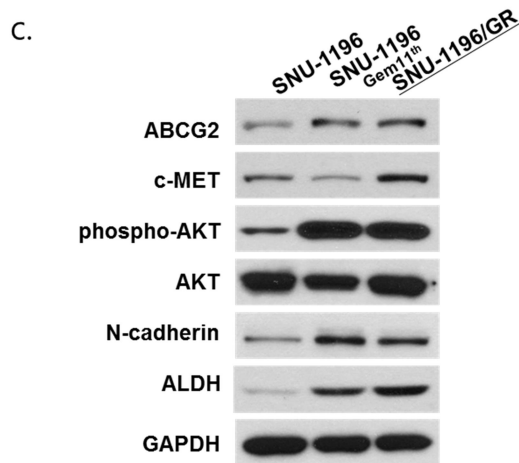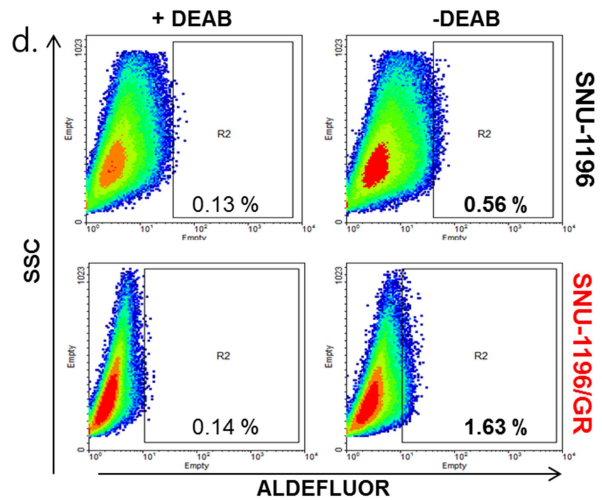

**Supplementary Figure 2.** Detection of proteins differentially expressed in tumours derived from SNU-1196 and SNU-1196/GR cells, as detected by immunohistochemistry using antibodies against ALDH, ABCG2, and MRP4.

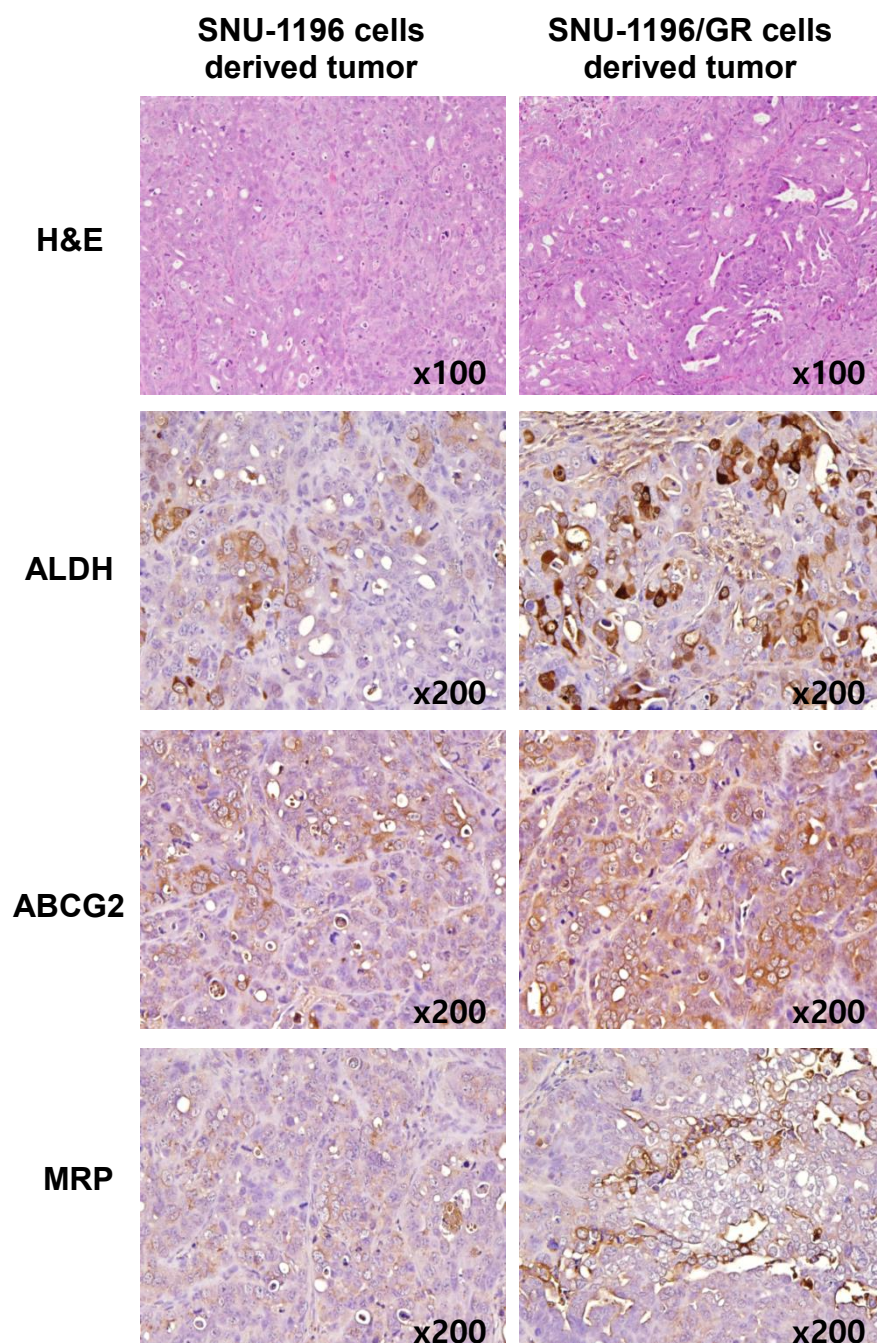

**Supplementary Figure 3.** Establishment of a GR cell line. (a, b) SNU-308 was treated with increasing doses of gemcitabine to establish a GR cell line (SNU-308/GR). Cell viability was assessed with the MTT assay; gemcitabine IC<sub>50</sub> values were 2.454 and 5.128 μM, respectively. (c–e) CG200745 (IC<sub>50</sub>) induced the expression of apoptosis-related protein p21 and inhibited that of c-MET, AKT, phospho-MEK, and phospho-ERK, as determined by western blotting (c); inhibited the expression of multidrug resistance genes, as determined by PCR (d); and altered the expression level of HDAC isozyme, as determined by western blotting (e).

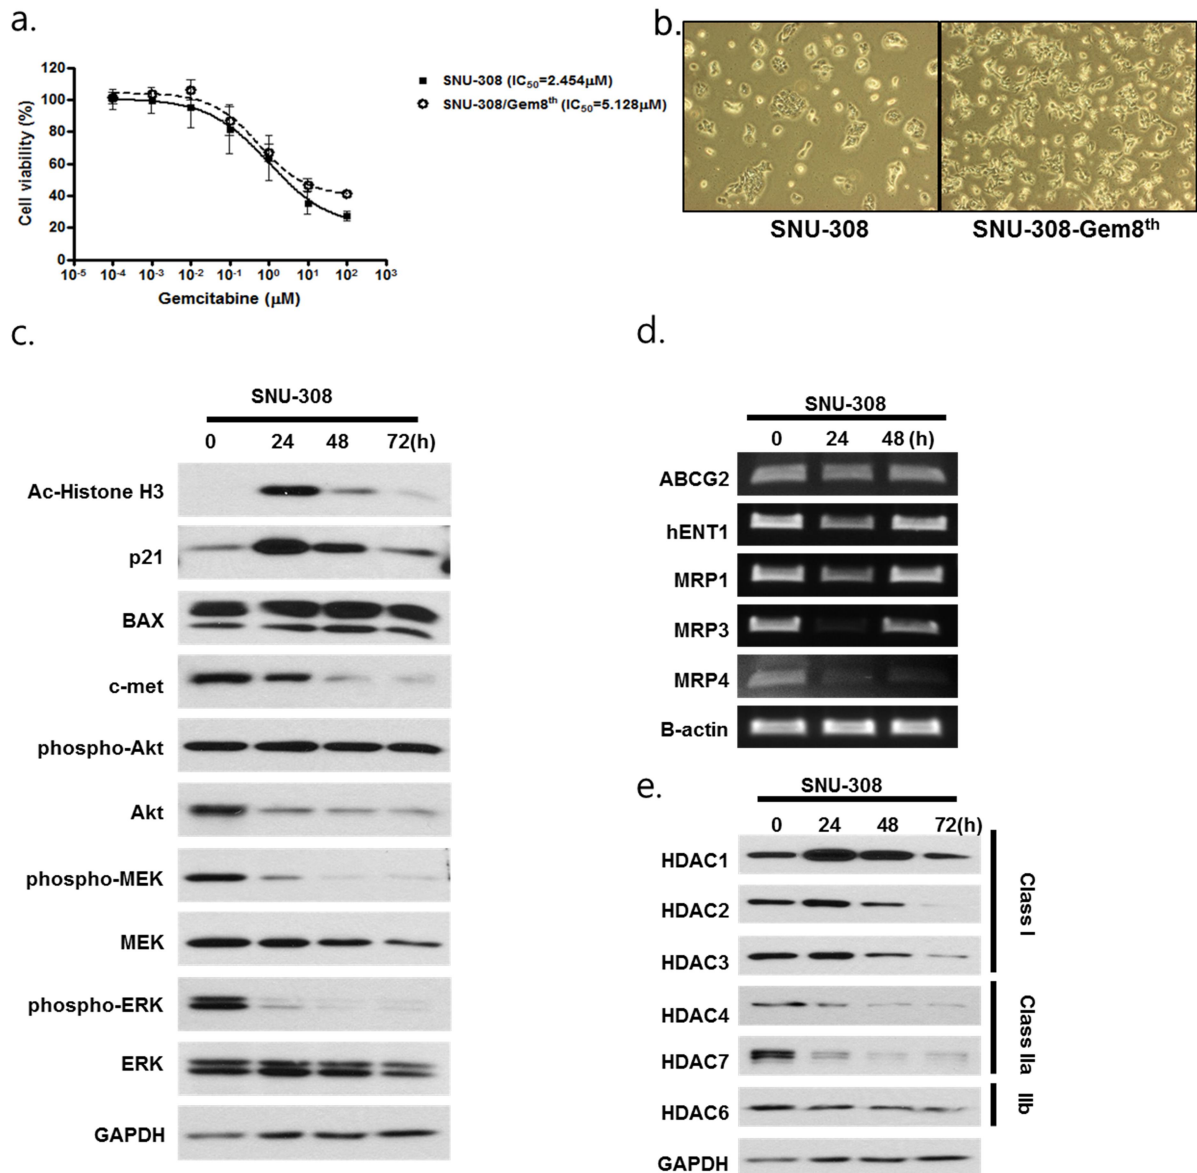



**Supplementary Figure 5.** (a) Gene expression profiles were analysed using Affymetrix Human Genechip 2.0 and differentially expressed genes (cut-off, fold change  $\geq 2$ ,  $P < 0.05$ ) were identified by cluster analysis-hierarchical clustering (Euclidean method, complete linkage). Based on clustering results, overall gene expression patterns in SNU-1196 and SNU-1196/GR either pre- (0 h) or post- (24 h) treatment with CG200745 were hierarchically organised. (b) MiRNA expression profiles were analysed with a human Affymetrix GeneChip miRNA 4.0 Array and differentially expressed miRNAs (cut-off, fold change  $\geq 1.5$ ,  $P < 0.05$ ) were identified by cluster analysis-hierarchical clustering (Euclidean method, complete linkage). Based on clustering results, overall miRNA expression patterns in SNU-1196 and SNU-1196/GR either pre- (0 h) or post- (24 h) treatment with CG200745 were hierarchically organised.

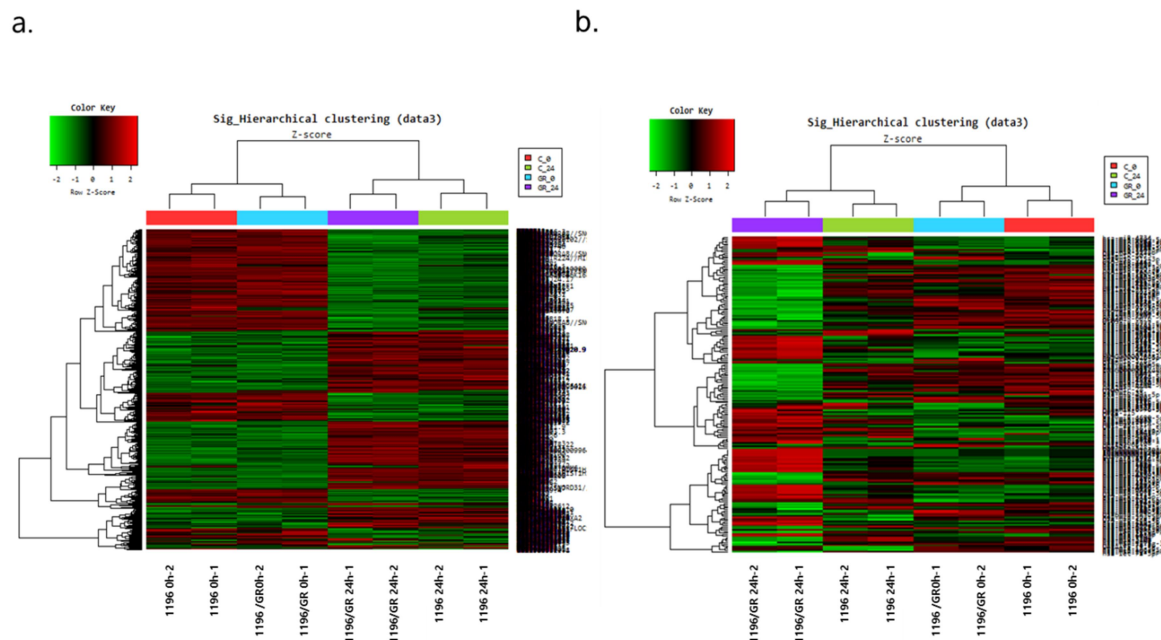

**Supplementary Table 1. Combination index (CI) and dose reduction index (DRI) of CG200745 in SNU-1196 cells**

**a.**

| SNU-1196                                   | Gemcitabine ( $\mu\text{M}$ ) |         | Cisplatin ( $\mu\text{M}$ ) |       | 5-FU ( $\mu\text{M}$ ) |      | Oxaliplatin ( $\mu\text{M}$ ) |       |
|--------------------------------------------|-------------------------------|---------|-----------------------------|-------|------------------------|------|-------------------------------|-------|
| Single ( $\text{IC}_{50}$ )                | 0.038                         |         | 4.90                        |       | 104.713                |      | 3.236                         |       |
| <b>CG200745 (<math>\mu\text{M}</math>)</b> | 0.25                          | 0.50    | 0.25                        | 0.50  | 0.25                   | 0.50 | 0.25                          | 0.50  |
| Combi ( $\text{IC}_{50}$ )                 | 0.002                         | <0.0001 | 0.56                        | 0.11  | 1.86                   | 0.01 | 1.59                          | 0.25  |
| <b>Dose reduction index</b>                | 19                            | >100    | 8.75                        | 44.55 | 56.29                  | >100 | 2.04                          | 12.94 |

**b.** Gemcitabine and CG200745

|                              |              |              |              |              |              |
|------------------------------|--------------|--------------|--------------|--------------|--------------|
| <b>Combination Index</b>     | <b>0.489</b> | <b>0.281</b> | <b>0.273</b> | <b>0.281</b> | <b>0.341</b> |
| Gemcitabine( $\mu\text{M}$ ) | 0.001        | 0.010        | 0.100        | 1.000        | 10.000       |
| CG200745( $\mu\text{M}$ )    | 0.250        | 0.250        | 0.250        | 0.250        | 0.250        |
| <b>Combination Index</b>     | <b>0.570</b> | <b>0.518</b> | <b>0.444</b> | <b>0.508</b> | <b>0.594</b> |
| Gemcitabine( $\mu\text{M}$ ) | 0.001        | 0.010        | 0.100        | 1.000        | 10.000       |
| CG200745( $\mu\text{M}$ )    | 0.500        | 0.500        | 0.500        | 0.500        | 0.500        |

Cisplatin and CG200745

|                            |              |              |              |
|----------------------------|--------------|--------------|--------------|
| <b>Combination Index</b>   | <b>0.567</b> | <b>0.447</b> | <b>0.635</b> |
| Cisplatin( $\mu\text{M}$ ) | 0.400        | 2.000        | 10.000       |
| CG200745( $\mu\text{M}$ )  | 0.250        | 0.250        | 0.250        |
| <b>Combination Index</b>   | <b>1.039</b> | <b>0.591</b> | <b>0.946</b> |
| Cisplatin( $\mu\text{M}$ ) | 0.400        | 2.000        | 10.000       |
| CG200745( $\mu\text{M}$ )  | 0.500        | 0.500        | 0.500        |

5-FU and CG200745

|                           |              |              |              |              |              |
|---------------------------|--------------|--------------|--------------|--------------|--------------|
| <b>Combination Index</b>  | <b>0.627</b> | <b>0.454</b> | <b>0.342</b> | <b>0.432</b> | <b>0.770</b> |
| 5-FU( $\mu\text{M}$ )     | 0.100        | 1.000        | 10.000       | 100.000      | 1000.000     |
| CG200745( $\mu\text{M}$ ) | 0.250        | 0.250        | 0.250        | 0.250        | 0.250        |
| <b>Combination Index</b>  | <b>0.665</b> | <b>0.494</b> | <b>0.449</b> | <b>0.424</b> | <b>0.718</b> |
| 5-FU( $\mu\text{M}$ )     | 0.100        | 1.000        | 10.000       | 100.000      | 1000.000     |
| CG200745( $\mu\text{M}$ ) | 0.500        | 0.500        | 0.500        | 0.500        | 0.500        |

Oxaliplatin and CG200745

|                              |                |                |                |                |
|------------------------------|----------------|----------------|----------------|----------------|
| <b>Combination Index</b>     | <b>0.84091</b> | <b>0.92858</b> | <b>0.78218</b> | <b>0.77119</b> |
| Oxaliplatin( $\mu\text{M}$ ) | 0.080          | 0.400          | 2.000          | 10.000         |
| CG200745( $\mu\text{M}$ )    | 0.250          | 0.250          | 0.250          | 0.250          |
| <b>Combination Index</b>     | <b>0.72283</b> | <b>0.62079</b> | <b>0.63581</b> | <b>0.77325</b> |
| Oxaliplatin( $\mu\text{M}$ ) | 0.080          | 0.400          | 2.000          | 10.000         |
| CG200745( $\mu\text{M}$ )    | 0.500          | 0.500          | 0.500          | 0.500          |

**c.** Gemcitabine plus Cisplatin and CG200745

|                              |              |              |              |              |              |              |
|------------------------------|--------------|--------------|--------------|--------------|--------------|--------------|
| <b>Combination Index</b>     | <b>0.763</b> | <b>0.583</b> | <b>0.494</b> | <b>0.468</b> | <b>0.545</b> | <b>0.654</b> |
| Gemcitabine( $\mu\text{M}$ ) | 0.00313      | 0.00625      | 0.01250      | 0.02500      | 0.05000      | 0.10000      |
| Cisplatin( $\mu\text{M}$ )   | 0.12813      | 0.25625      | 0.51240      | 1.02500      | 2.05000      | 4.10000      |
| CG200745( $\mu\text{M}$ )    | 0.50000      | 0.50000      | 0.50000      | 0.50000      | 0.50000      | 0.50000      |

**CI>1 indicates antagonism; CI=1 indicates an additive effect; and CI<1 indicates synergism. DRI>1 is favorable dose reduction that lead to toxicity reduction.**

**Supplementary Table 2. Combination index (CI) and dose reduction index (DRI) of CG200745 in SNU-308 cells**

**a.**

| SNU-308                                    | Gemcitabine ( $\mu\text{M}$ ) |       | Cisplatin ( $\mu\text{M}$ ) |      | 5-FU ( $\mu\text{M}$ ) |       | Oxaliplatin ( $\mu\text{M}$ ) |      |
|--------------------------------------------|-------------------------------|-------|-----------------------------|------|------------------------|-------|-------------------------------|------|
| Single ( $\text{IC}_{50}$ )                | 1.413                         |       | 3.80                        |      | 74.131                 |       | 6.918                         |      |
| <b>CG200745 (<math>\mu\text{M}</math>)</b> | 0.50                          | 1.00  | 0.50                        | 1.00 | 0.50                   | 1.00  | 0.50                          | 1.00 |
| Combi ( $\text{IC}_{50}$ )                 | 0.32                          | 0.13  | 2.34                        | 1.82 | 44.67                  | 17.78 | 4.57                          | 2.82 |
| <b>Dose reduction index</b>                | 4.47                          | 11.21 | 1.62                        | 2.09 | 1.66                   | 4.17  | 1.51                          | 2.45 |

**b.** Gemcitabine and CG200745

|                              |              |              |              |              |
|------------------------------|--------------|--------------|--------------|--------------|
| <b>Combination Index</b>     | <b>0.559</b> | <b>0.369</b> | <b>0.244</b> | <b>0.640</b> |
| Gemcitabine( $\mu\text{M}$ ) | 0.001        | 0.010        | 0.100        | 1.000        |
| CG200745( $\mu\text{M}$ )    | 0.500        | 0.500        | 0.500        | 0.500        |
| <b>Combination Index</b>     | <b>0.723</b> | <b>0.507</b> | <b>0.312</b> | <b>0.614</b> |
| Gemcitabine( $\mu\text{M}$ ) | 0.001        | 0.010        | 0.100        | 1.000        |
| CG200745( $\mu\text{M}$ )    | 1.000        | 1.000        | 1.000        | 1.000        |

Cisplatin and CG200745

|                            |       |       |              |              |              |
|----------------------------|-------|-------|--------------|--------------|--------------|
| <b>Combination Index</b>   | 1.474 | 1.005 | 1.001        | <b>0.484</b> | <b>0.475</b> |
| Cisplatin( $\mu\text{M}$ ) | 0.001 | 0.010 | 0.100        | 1.000        | 10.000       |
| CG200745( $\mu\text{M}$ )  | 0.500 | 0.500 | 0.500        | 0.500        | 0.500        |
| <b>Combination Index</b>   | 1.016 | 1.381 | <b>0.772</b> | <b>0.366</b> | <b>0.484</b> |
| Cisplatin( $\mu\text{M}$ ) | 0.001 | 0.010 | 0.100        | 1.000        | 10.000       |
| CG200745( $\mu\text{M}$ )  | 1.000 | 1.000 | 1.000        | 1.000        | 1.000        |

5-FU and CG200745

|                           |              |              |       |       |              |
|---------------------------|--------------|--------------|-------|-------|--------------|
| <b>Combination Index</b>  | <b>0.892</b> | <b>0.772</b> | 1.096 | 1.313 | <b>0.589</b> |
| 5-FU( $\mu\text{M}$ )     | 0.001        | 0.010        | 0.100 | 1.000 | 10.000       |
| CG200745( $\mu\text{M}$ ) | 1.000        | 1.000        | 1.000 | 1.000 | 1.000        |

Oxaliplatin and CG200745

|                              |              |              |              |              |              |
|------------------------------|--------------|--------------|--------------|--------------|--------------|
| <b>Combination Index</b>     | <b>0.907</b> | <b>0.914</b> | <b>0.825</b> | <b>0.887</b> | <b>0.233</b> |
| Oxaliplatin( $\mu\text{M}$ ) | 0.010        | 0.100        | 1.000        | 10.000       | 10.000       |
| CG200745( $\mu\text{M}$ )    | 1.000        | 1.000        | 1.000        | 1.000        | 1.000        |

**c.** Gemcitabine plus Cisplatin and CG200745

|                              |              |              |              |              |              |
|------------------------------|--------------|--------------|--------------|--------------|--------------|
| <b>Combination Index</b>     | <b>0.818</b> | <b>0.696</b> | <b>0.478</b> | <b>0.408</b> | <b>0.301</b> |
| Gemcitabine( $\mu\text{M}$ ) | 0.063        | 0.125        | 0.250        | 0.500        | 1.000        |
| Cisplatin( $\mu\text{M}$ )   | 0.144        | 0.288        | 0.575        | 1.150        | 2.300        |
| CG200745( $\mu\text{M}$ )    | 1.000        | 1.000        | 1.000        | 1.000        | 1.000        |

**CI>1 indicates antagonism; CI=1 indicates an additive effect; and CI<1 indicates synergism. DRI>1 is favorable dose reduction that lead to toxicity reduction.**



**Supplementary Table 3. Combination index (CI) and dose reduction index (DRI) of CG200745 in SNU-1196/GR**

**a.**

| SNU-1196/GR                                | Gemcitabine ( $\mu\text{M}$ ) |       | 5-FU ( $\mu\text{M}$ ) |       |      |
|--------------------------------------------|-------------------------------|-------|------------------------|-------|------|
| Single ( $\text{IC}_{50}$ )                | 2.291                         |       | 229.0                  |       |      |
| <b>CG200745 (<math>\mu\text{M}</math>)</b> | 0.25                          | 0.50  | 0.25                   | 0.50  | 1.00 |
| Combi ( $\text{IC}_{50}$ )                 | 0.21                          | 0.05  | 35.48                  | 6.76  | 0.42 |
| <b>Dose reduction index</b>                | 10.91                         | 45.82 | 6.45                   | 33.88 | >100 |

**b.** Gemcitabine and CG200745

|                              |              |              |              |              |              |              |
|------------------------------|--------------|--------------|--------------|--------------|--------------|--------------|
| <b>Combination Index</b>     | <b>0.637</b> | <b>0.589</b> | <b>0.279</b> | <b>0.083</b> | <b>0.149</b> | <b>1.140</b> |
| Gemcitabine( $\mu\text{M}$ ) | 0.001        | 0.010        | 0.100        | 1.000        | 10.000       | 100.000      |
| CG200745( $\mu\text{M}$ )    | 0.250        | 0.250        | 0.250        | 0.250        | 0.250        | 0.250        |
| <b>Combination Index</b>     | <b>0.613</b> | <b>0.618</b> | <b>0.206</b> | <b>0.114</b> | <b>0.151</b> | <b>0.937</b> |
| Gemcitabine( $\mu\text{M}$ ) | 0.001        | 0.010        | 0.100        | 1.000        | 10.000       | 100.000      |
| CG200745( $\mu\text{M}$ )    | 0.500        | 0.500        | 0.500        | 0.500        | 0.500        | 0.500        |

5-FU and CG200745

|                           |              |              |              |              |              |              |
|---------------------------|--------------|--------------|--------------|--------------|--------------|--------------|
| <b>Combination Index</b>  | <b>0.803</b> | <b>0.620</b> | <b>0.478</b> | <b>0.356</b> | <b>0.606</b> | <b>0.785</b> |
| 5-FU( $\mu\text{M}$ )     | 0.010        | 0.100        | 1.000        | 10.000       | 100.000      | 1000.000     |
| CG200745( $\mu\text{M}$ ) | 0.250        | 0.250        | 0.250        | 0.250        | 0.250        | 0.250        |
| <b>Combination Index</b>  | <b>1.062</b> | <b>1.037</b> | <b>0.652</b> | <b>0.336</b> | <b>0.234</b> | <b>0.552</b> |
| 5-FU( $\mu\text{M}$ )     | 0.010        | 0.100        | 1.000        | 10.000       | 100.000      | 1000.000     |
| CG200745( $\mu\text{M}$ ) | 0.500        | 0.500        | 0.500        | 0.500        | 0.500        | 0.500        |
| <b>Combination Index</b>  | <b>0.856</b> | <b>0.757</b> | <b>0.522</b> | <b>0.221</b> | <b>0.177</b> | <b>0.427</b> |
| 5-FU( $\mu\text{M}$ )     | 0.010        | 0.100        | 1.000        | 10.000       | 100.000      | 1000.000     |
| CG200745( $\mu\text{M}$ ) | 1.000        | 1.000        | 1.000        | 1.000        | 1.000        | 1.000        |

**CI>1 indicates antagonism; CI=1 indicates an additive effect; and CI<1 indicates synergism. DRI>1 is favorable dose reduction that lead to toxicity reduction.**

**Supplementary Table 4. List of primers used in PCR analysis.**

| <b>Gene</b>                     | <b>Sense</b>             | <b>Antisense</b>        |
|---------------------------------|--------------------------|-------------------------|
| <i>ABCG2</i>                    | TATGAGTGGCTTATCCTGCT     | CACTGATCCTTCCATCTTGT    |
| <i>hENT1</i>                    | GACAACCAGTCACCAGCCTCAG   | AGAGCATCCAGCTGCACCTTCA  |
| <i>MRP1</i>                     | CTGACAAGCTAGACCATGAATGT  | TCACACCAAGCCGGCGTCTTT   |
| <i>MRP3</i>                     | GGACCCTGCGCATGAACCTG     | AGGCAAGTCCAGCATCTCTGG   |
| <i>MRP4</i>                     | GGATCCAAGAACTGATGAGTTAAT | TCACAGTGCTGTCTCGAAAATAG |
| <i>MRP5</i>                     | GCTGTTCAAGTGGCACTGTCAG   | TCAGCCCTTGACAGCGACCTT   |
| <i><math>\beta</math>-Actin</i> | GGCATCCTCACCTGAAGTA      | GGGGTGTGAAGGTCTCAA      |

**Supplementary Table 5. List of antibodies used in western blotting and immunohistochemistry**

| <b>Primary antibodies</b> | <b>Supplier</b>                             | <b>Species</b> | <b>Type</b> |
|---------------------------|---------------------------------------------|----------------|-------------|
| Acetylated histone h3     | Santa Cruz Biotechnology (Santa Cruz, CA)   | Rabbit         | polyclonal  |
| C-Met                     | Santa Cruz Biotechnology                    | Rabbit         | polyclonal  |
| Caspase-3                 | Santa Cruz Biotechnology                    | Mouse          | monoclonal  |
| p21                       | Santa Cruz Biotechnology                    | Rabbit         | polyclonal  |
| BAX                       | Santa Cruz Biotechnology                    | Rabbit         | polyclonal  |
| AKT                       | Santa Cruz Biotechnology                    | Rabbit         | polyclonal  |
| ERK                       | Santa Cruz Biotechnology                    | Rabbit         | polyclonal  |
| MRP4                      | Santa Cruz Biotechnology                    | Mouse          | monoclonal  |
| HDAC7                     | Santa Cruz Biotechnology                    | Mouse          | monoclonal  |
| GAPDH                     | Santa Cruz Biotechnology                    | Mouse          | monoclonal  |
| SMAD3                     | Santa Cruz Biotechnology                    | Mouse          | monoclonal  |
| NOTCH3                    | Santa Cruz Biotechnology                    | Rabbit         | polyclonal  |
| HES5                      | Santa Cruz Biotechnology                    | Goat           | polyclonal  |
| ABCG2                     | Santa Cruz Biotechnology                    | Rabbit         | polyclonal  |
| Phospho-AKT               | Cell Signaling Technology (Danvers, MA)     | Rabbit         | polyclonal  |
| Phospho-MEK               | Cell Signaling Technology                   | Rabbit         | polyclonal  |
| MEK                       | Cell Signaling Technology                   | Rabbit         | polyclonal  |
| Phospho-ERK               | Cell Signaling Technology                   | Rabbit         | polyclonal  |
| HDAC1                     | Cell Signaling Technology                   | Mouse          | monoclonal  |
| HDAC2                     | Cell Signaling Technology                   | Mouse          | monoclonal  |
| HDAC3                     | Cell Signaling Technology                   | Mouse          | monoclonal  |
| HDAC4                     | Cell Signaling Technology                   | Rabbit         | polyclonal  |
| HDAC6                     | Cell Signaling Technology                   | Rabbit         | polyclonal  |
| YAP                       | Cell Signaling Technology                   | Rabbit         | polyclonal  |
| AXL                       | Cell Signaling Technology                   | Rabbit         | polyclonal  |
| PARP                      | Cell Signaling Technology                   | Rabbit         | polyclonal  |
| TEAD4                     | Abcam (Cambridge, UK)                       | Rabbit         | polyclonal  |
| N-cadherin                | Abcam                                       | Mouse          | monoclonal  |
| ALDH                      | BD Transduction Laboratories (San Jose, CA) | Mouse          | monoclonal  |
| TGF- $\beta$ 2            | Proteintech (Rosemont, IL)                  | Rabbit         | polyclonal  |
| Cleaved-Caspase 3         | Cell Signaling Technology                   | Rabbit         | polyclonal  |
